# Supplementary material for: Molecular amplification of two different receptors using diastereomeric templates
Source: Royal Society of Chemistry journal article supplement (doi:10.1039/b705620f), 2007-01-01
Supplement: b705620f.pdf [file b705620f.pdf]

*Supporting information to: F. Bulos; S. L. Roberts; R. L. E. Furlan; J. K. M. Sanders.  
Molecular amplification of two different receptors using diastereomeric  
Templates*

HPLC traces of the library (a) in presence of 6-OMe-quinoline and quinuclidine, (b) in presence of cinchonine, (c) in presence of cinchonidine

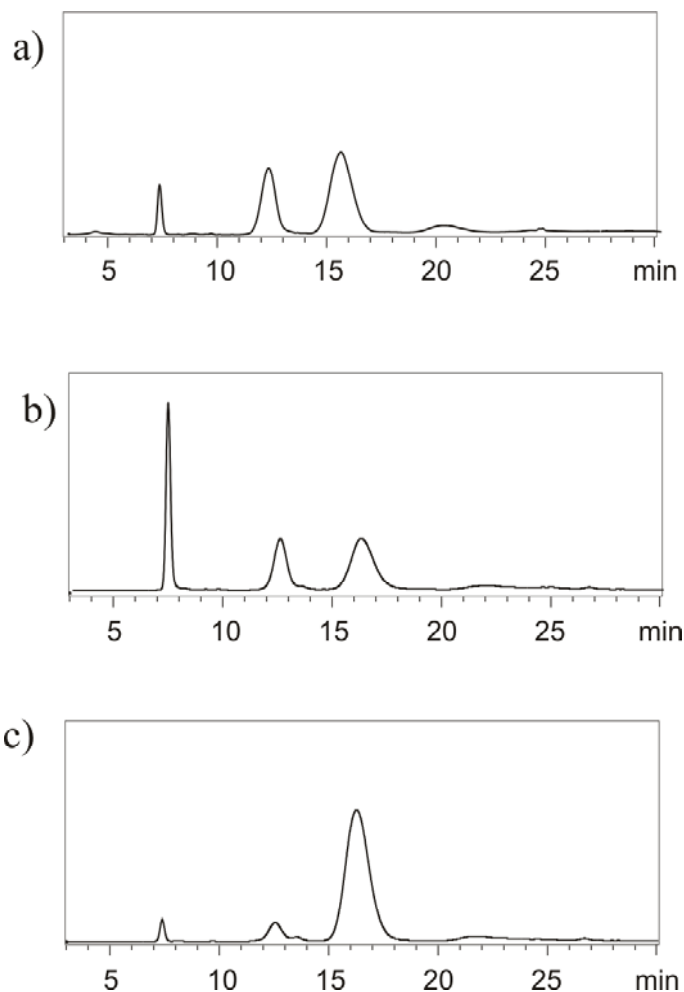

HPLC analysis was carried out using a Hewlett-Packard 1050 instrument, coupled to a HP 1050 DAD; data were analysed using HP ChemStation. Reverse phase HPLC separations were carried out using a 15cm x 4.6mm i.d. 3 $\mu$ m particle size, Supelco ABZ+ C18 alkylamide column using acetonitrile and water gradients.
